# Supplementary material for: Beyond One-Size-Fits-All: Tailoring Teicoplanin Regimens for Normal Renal Function Patients Using Population Pharmacokinetics and Monte Carlo Simulation
Source: MDPI journal article supplement (doi:10.3390/pharmaceutics16040499), 2024-04-05
Supplement: s1 [file s1]

## Supplementary Figures

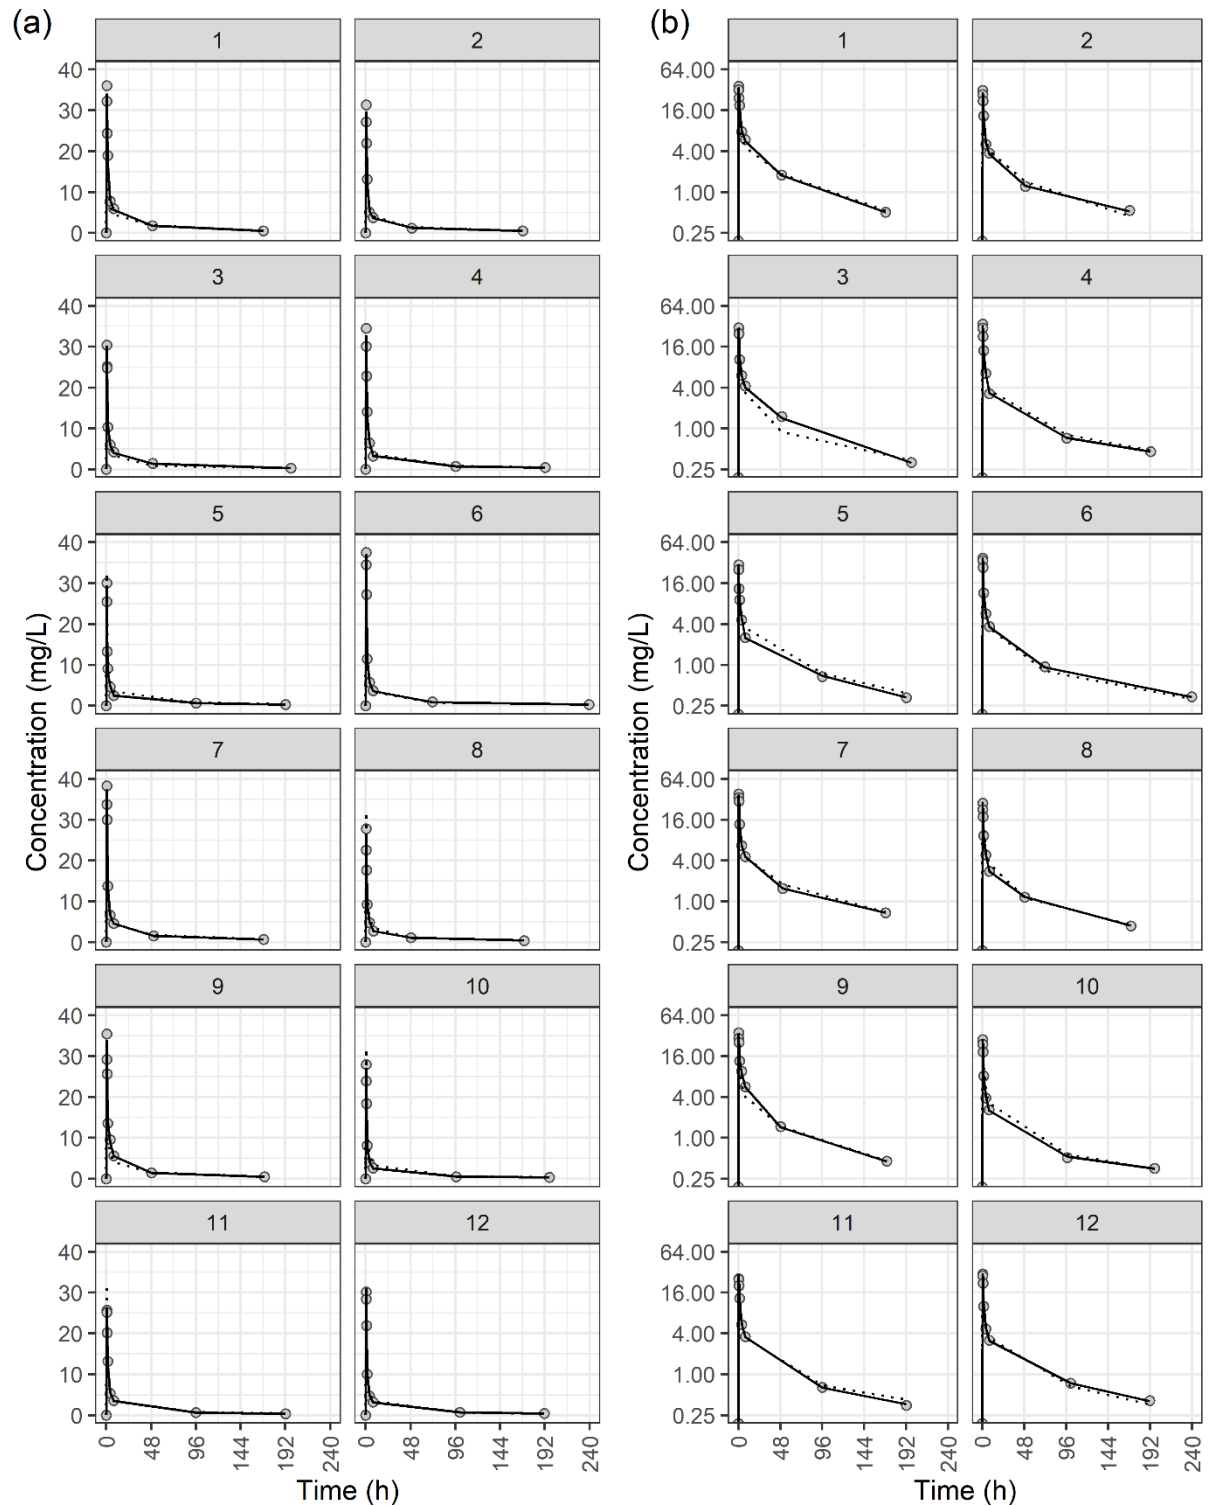

**Figure S1. Individual fit plots of Teicoplanin (a) Normal scale, (b) semi-log scale: closed circles, observed concentrations; solid line, individual-predicted concentrations; dotted line, population-predicted concentrations.**

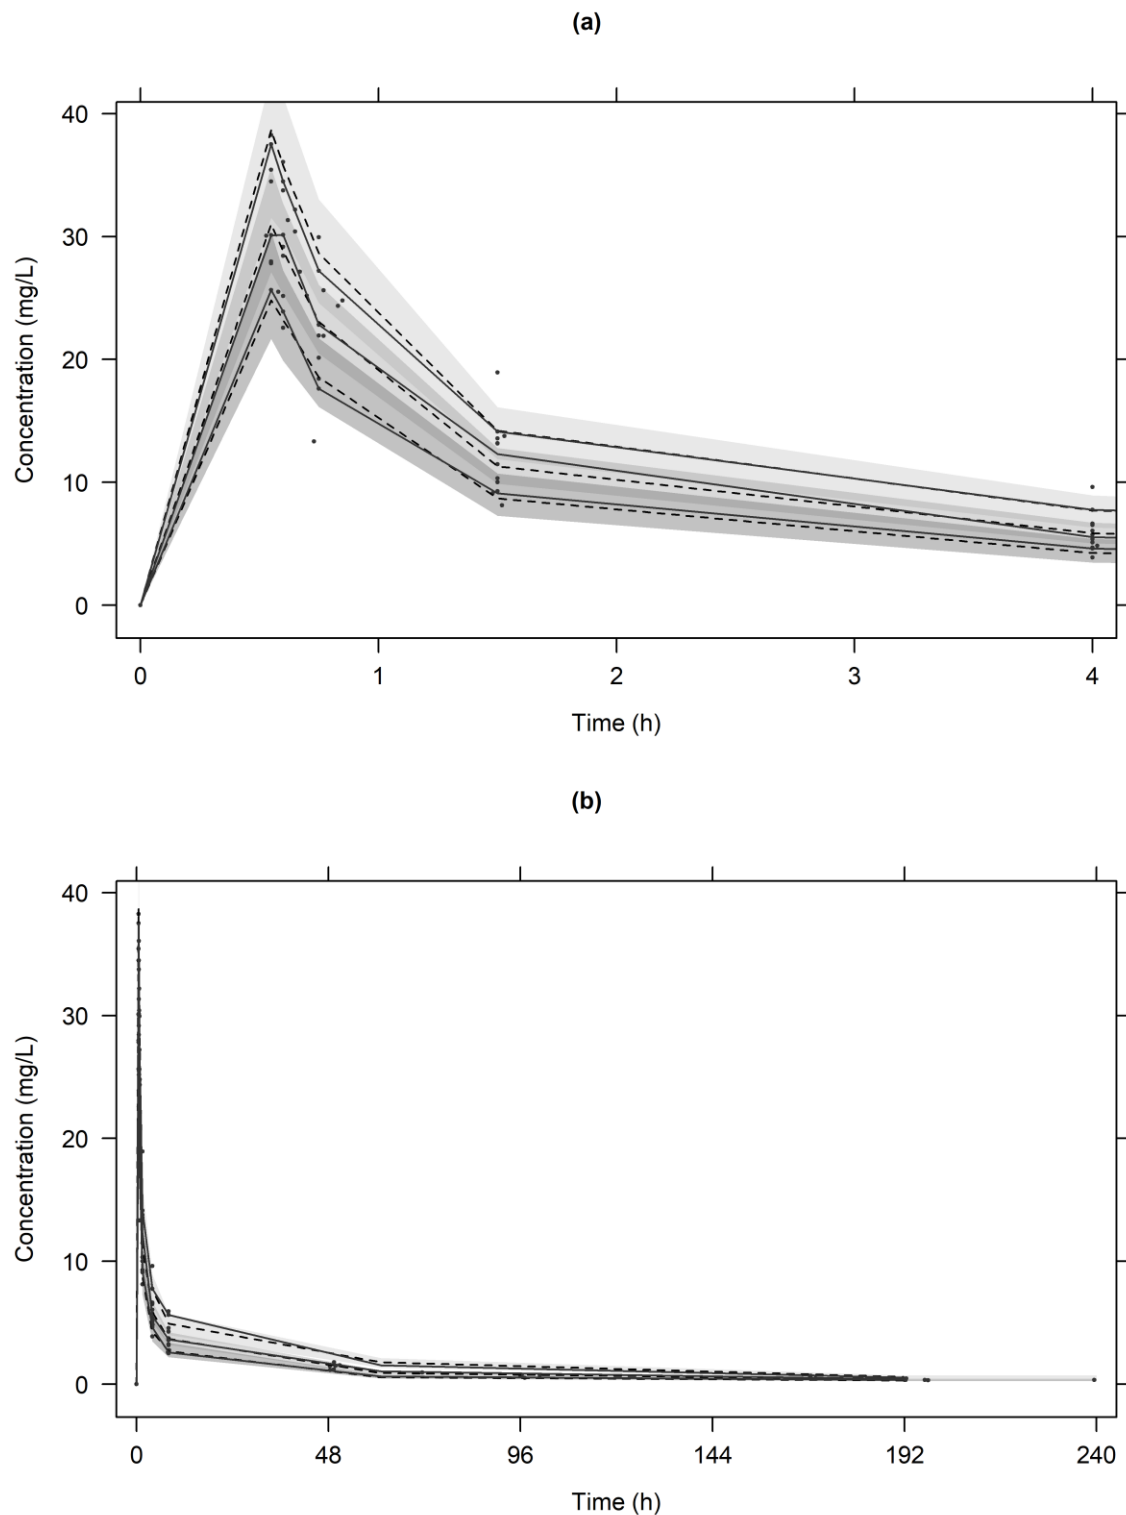

Figure S2. Visual predictive check from simulated concentrations of 1,000 virtual datasets of teicoplanin (a) 0 to 4 h, (b) 0 to 240 h: closed circles, observed concentrations; solid lines, 10th, 50th and 90th percentiles of observations; dashed lines, 10th, 50th and 90th percentiles of simulated concentrations; and shaded areas, 95% confidence intervals for the 10th, 50th, and 90th percentiles of simulated concentrations.
